# Supplementary material
Source: PubMed Central journal article supplement (PMC1458640)

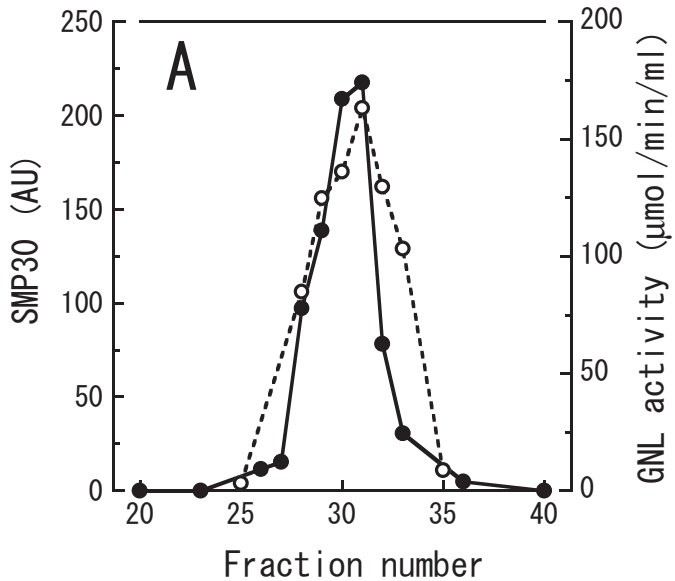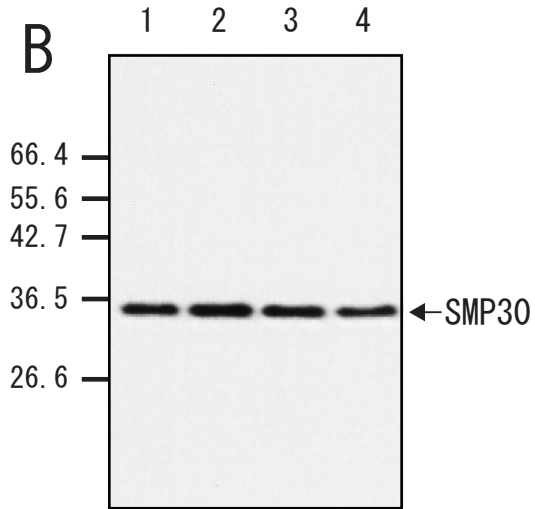

Supplement: pnas_0511225103_1.pdf [file pnas_0511225103_1.pdf]

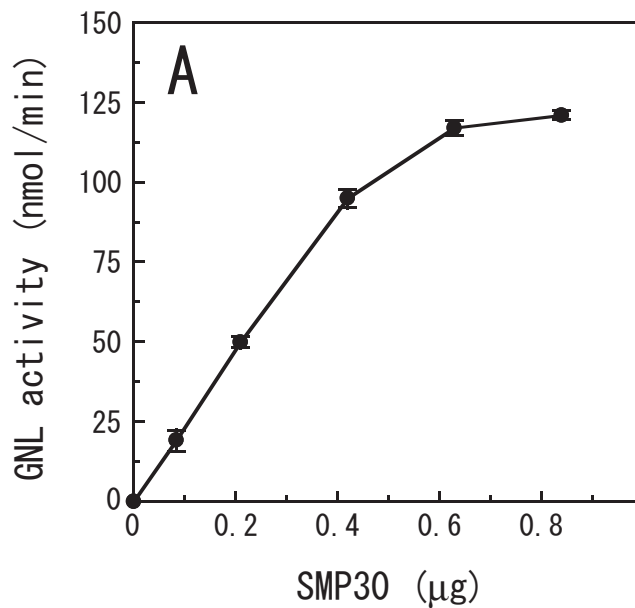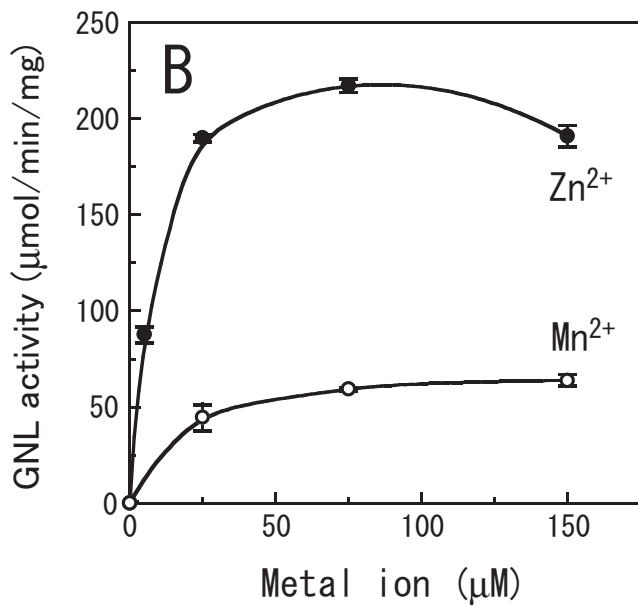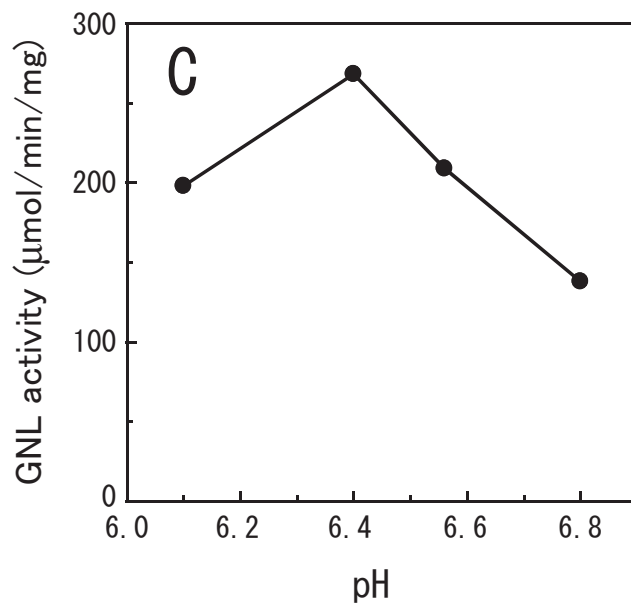

Supplement: pnas_0511225103_2.pdf [file pnas_0511225103_2.pdf]

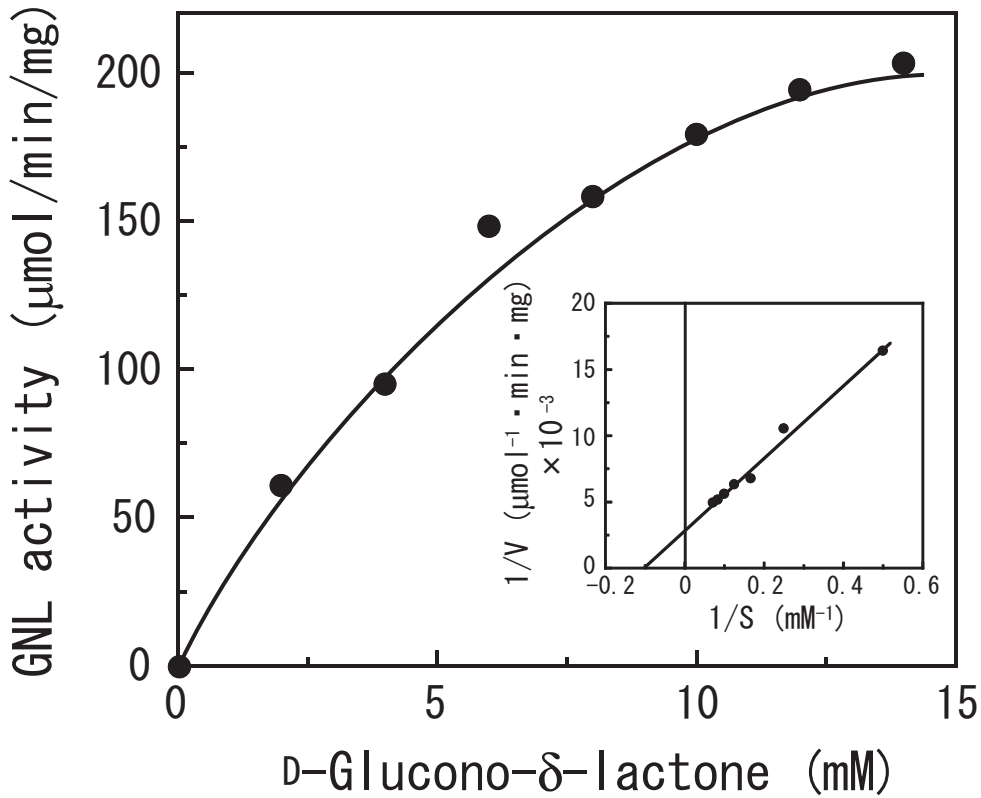

Supplement: pnas_0511225103_3.pdf [file pnas_0511225103_3.pdf]
